# Supplementary material for: Brain and blood single-cell transcriptomics in acute and subacute phases after experimental stroke
Source: PubMed Central journal article supplement — bioRxiv. 2023 Apr 3:2023.03.31.535150. Preprint. [Version 1] doi: 10.1101/2023.03.31.535150 (PMC10103945; doi:10.1101/2023.03.31.535150), 2023-04-03
Supplement: media-2.pdf [file media-2.pdf]

**Table 1. Antibodies used for cytometric analysis and sorting**

| <b>Antigen</b>      | <b>Label</b> | <b>Clone</b> | <b>Isotype</b>   | <b>Supplier</b> | <b>RRID</b> |
|---------------------|--------------|--------------|------------------|-----------------|-------------|
| <b>CD11b</b>        | APC/Cy7      | M1/70        | rat IgG2b, κ     | Biolegend       | AB_830641   |
| <b>CD11c</b>        | PE/Cy7       | N418         | Armenian hamster | Biolegend       | AB_493569   |
| <b>CD16/CD32</b>    |              | 93           | rat IgG2b, λ     | Biolegend       | AB_312800   |
| <b>CD172a</b>       | AF700        | P89          | Rat IgG1, κ      | Biolegend       | AB_2650812  |
| <b>CD4</b>          | F488         | RM4-5        | rat IgG2a, κ     | Biolegend       | AB_493373   |
| <b>CD45</b>         | BV510        | 30F-11       | rat IgG2b, κ     | Biolegend       | AB_2561392  |
| <b>CD45</b>         | APC          | 30F-11       | rat IgG2b, κ     | Biolegend       | AB_312976   |
| <b>CX3CR1</b>       | PE           | SA011F11     | rat IgG2a, κ     | Biolegend       | AB_2564314  |
| <b>F4/80</b>        | PE-Cy5       | BM8          | rat IgG2a, κ     | Biolegend       | AB_893494   |
| <b>I-A/I-E</b>      | BV605        | M5/114.15.2  | rat IgG2b, κ     | Biolegend       | AB_2565894  |
| <b>Ly6C</b>         | FITC         | HK1.4        | rat IgG2c, κ     | Biolegend       | AB_1186134  |
| <b>Ly6G</b>         | PerCP/Cy5.5  | 1A8          | rat IgG2a, κ     | Biolegend       | AB_1877272  |
| <b>Ly6G</b>         | APC          | 1A8          | rat IgG2a, κ     | Biolegend       | AB_1877163  |
| <b>TCR β</b>        | PerCP/Cy5.5  | H57-597      | Armenian hamster | Biolegend       | AB_1575176  |
| <b>TER-119</b>      | Biotin       | TER-119      | rat IgG2b, κ     | Biolegend       | AB_313704   |
| <b>XCR1</b>         | PerCP/Cy5.5  | ZET          | mouse IgG2b, κ   | Biolegend       | AB_2564363  |
| <b>CD197 (CCR7)</b> | PE           | 4B12         | rat IgG2a, κ     | Biolegend       | AB_2564363  |
| <b>CD209a</b>       | PE           | MMD3         | mouse IgG2c, κ   | Biolegend       | AB_2721636  |
| <b>Lin:</b>         |              |              |                  |                 |             |
| <b>CD19</b>         | FITC         | 6D5          | rat IgG2a, κ     | Biolegend       | AB_313640   |
| <b>CD3ε</b>         | FITC         | 145-2C11     | Armenian hamster | Biolegend       | AB_312670   |

---

|              |      |         |                     |           |            |
|--------------|------|---------|---------------------|-----------|------------|
| <b>Ly6G</b>  | FITC | 1A8     | rat IgG2a, κ        | Biolegend | AB_1236488 |
| <b>NK1.1</b> | FITC | PK136   | mouse<br>IgG2a, κ   | Biolegend | AB_313392  |
| <b>TCR β</b> | FITC | H57-597 | Armenian<br>hamster | Biolegend | AB_313428  |

---

## Table S2. Drop-Seq run description

| Sample Name | Microfluidic Device | Bead Lot Number | Quantine HJ USED? | Bead No. collected (theoretical) | Bead No. (after Wash) | Bead No. (before Amp.) | Amp. Cycles | cDNA (ng/ $\mu$ l) | Total cDNA Yield ng | Library (ng/ $\mu$ l) | Mouse Strain        | Sex    | Age   | No. of mice pooled | EC10 <sup>3</sup> | MGx10 <sup>3</sup> | CD45x10 <sup>3</sup> | Td-cellsx10 <sup>3</sup> | Cell populations within the sample   | Treatment | Order Number | Index Primer | Illumina Run ID                     | Type (Next Seq/10x etc) | Sequencing sample ID | Seurat Designation |  |
|-------------|---------------------|-----------------|-------------------|----------------------------------|-----------------------|------------------------|-------------|--------------------|---------------------|-----------------------|---------------------|--------|-------|--------------------|-------------------|--------------------|----------------------|--------------------------|--------------------------------------|-----------|--------------|--------------|-------------------------------------|-------------------------|----------------------|--------------------|--|
| GR200817    | 12/18/19 0.9mm      | 101619          | YES               | 120,000                          | 83,163                | 87,888                 | 15          | 0.184              | 77.6                | 2.26                  | CB7B6_WT            | female | 18m   | 3                  | 18                | 46                 | 72                   | N/A                      | EC (18K); MG154K; CD45H(72);         | DO2       |              |              |                                     |                         |                      |                    |  |
| GR210225    | 12/18/19 0.9mm      | 101619          | YES               | 93,333                           | 78,107                | 85,690                 | 15          | 0.0811             | 25.952              |                       | CB7B6_WT            | female | 18m   | 3                  | 20                | 20                 | 120                  | N/A                      | EC (20K); MG120K; CD45H(120K);       | DO2       |              | N701         |                                     |                         |                      |                    |  |
| GR200812    | 12/18/19 0.9mm      | 101619          | YES               | 96,666                           | 76,502                | 69,660                 | 15          | 0.191              | 68.76               | 2.4                   | CB7B6_WT            | female | 18m   | 2                  | 25                | 124                | 54                   | N/A                      | EC (25K); MG124K; CD45H(54);         | D14       |              | N705         |                                     |                         |                      |                    |  |
| GR200728    | 12/18/19 0.9mm      | 101619          | YES               | 113,333                          | 102,773               | 74,894                 | 15          | 0.172              | 67.08               | 1.7                   | CB7B6_WT            | female | 18m   | 4                  | 32                | 141                | 44                   | N/A                      | EC (32K); MG141K; CD45H(44);         | S02       |              | N704         |                                     |                         |                      |                    |  |
| GR190610    | 10/04/18 0.9mm      | 012819C         | YES               | 104,000                          | 98,662                | 69,841                 | 15          | 0.313              | 100.16              | 4.06                  | OXCR1_CreRhet_Tdhet | male   | 8-12w | 4                  | N/A               | N/A                | N/A                  | 125                      | Td-cells (MG125K)                    | S02002D14 | 10417514     | N704         | 190624_N5500503_0929_AH NextSeq 500 | GR190610_CTACGAGA       |                      |                    |  |
| GR190723    | 12/18/19 0.9mm      | 101619          | YES               | 53,333                           | 51,386                | 39,161                 | 15          | 0.202              | 40.4                | 2.8                   | CB7B6_WT            | male   | 17m   | 2                  | 12                | 25                 | 18                   | N/A                      | EC (12K); MG125K; CD45H(18);         | DO2       |              |              |                                     |                         |                      |                    |  |
| GR180426    |                     | 83117           | no                | 125,000                          | 78,800                | 50,780                 | 14          | 0.124              | 125.76              |                       | CB7B6_WT            | male   | 8w    | 6                  | 24                | 24                 | 200                  | N/A                      | EC (24K); MG124K; CD45H(200K)        | DO2       |              |              |                                     |                         |                      |                    |  |
| GR180413tag |                     | 83117           | no                | 152,000                          | 102,773               | 64,607                 | 15          | 0.305              | 122                 |                       | CB7B6_WT            | male   | 8w    | 5                  | 25                | 25                 | 150                  | N/A                      | EC (25K); MG125K; CD45H(150K);       | D14       | 10400214     | N701         | 180705_N5500503_0712_AH NextSeq 500 | GR180613TAG_TAAGGGGA    | D02R1                |                    |  |
| GR180414tag |                     | 83117           | no                | 164,000                          | 131,550               | 82,835                 | 15          | 0.175              | 70                  |                       | CB7B6_WT            | male   | 8w    | 5                  | 25                | 25                 | 150                  | N/A                      | EC (25K); MG125K; CD45H(150K);       | DO2       | 10400214     | N702         | 180705_N5500503_0712_AH NextSeq 500 | GR180614TAG_CTACTAG     | D14R2                |                    |  |
| GR180917AG  |                     | 83117           | YES               | 112,000                          | 53,442                | 48,546                 | 15          | 0.418              | 102.72              | 2.1                   | CB7B6_WT            | male   | 8w    | 4                  | 25                | 25                 | 150                  | N/A                      | EC (25K); MG125K; CD45H(150K);       | D14       | 10404808     | N702         | 181012_N5500503_0767_AH NextSeq 500 | GR180917AG_CTACTAGC     | D14R3                |                    |  |
| GR180919AG  |                     | 83117           | YES               | 136,000                          | 92,496                | 81,210                 | 15          | 0.443              | 132.9               | 2.72                  | CB7B6_WT            | male   | 8w    | 5                  | 25                | 25                 | 150                  | N/A                      | EC (25K); MG125K; CD45H(150K);       | DO2       | 10404808     | N704         | 181012_N5500503_0767_AH NextSeq 500 | GR180919AG_CTACTAGC     | D02R3                |                    |  |
| GR190110    | 10/4/18             | 72818           | YES               | 160,000                          | 106,884               | 82,775                 | 15          | 0.159              | 47.7                | 2.6                   | CB7B6_WT            | male   | 8w    | 4                  | 33                | 134                | 33                   | N/A                      | EC (33K); MG1134K; CD45H(33K);       | S02       | 10410132     | N704         | 190205_N5500503_0819_AH NextSeq 500 | GR190110_CTACTAGC       | S02R4                |                    |  |
| GR180716AG  | 10/4/18             | 83117           | no                | 157,320                          | 133,605               | 79,406                 | 15          | 0.188              | 75.2                | 2.18                  | CB7B6_WT            | male   | 8w    | 4                  | 35.7              | 191                | 28.1                 | N/A                      | EC (35.7K); MG1191K; CD45H(28.1K);   | S02       | 10404808     | N701         | 181012_N5500503_0767_AH NextSeq 500 | GR180716AG_TGCGCTTA     | S02R1                |                    |  |
| GR181128    | 10/4/18             | 72818           | YES               | 160,000                          | 156,215               | 82,912                 | 15          | 0.221              | 66.3                | 3.04                  | CB7B6_WT            | male   | 8w    | 4                  | 42                | 133                | 60                   | N/A                      | EC (42K); MG1133K; CD45H(60K);       | S02       | 10408151     | N702         | 181213_N5500503_0808_AH NextSeq 500 | GR181128_CTACTAGC       | S02R2                |                    |  |
| GR181114    | 10/4/18             | 72818           | YES               | 160,000                          | 168,548               | 131,923                | 15          | 0.145              | 69.6                | 2.4                   | CB7B6_WT            | male   | 9w    | 4                  | 45                | 125                | 209                  | N/A                      | EC (45K); MG1123K; CD45H(209K);      | D14       | 10408151     | N702         | 181213_N5500503_0808_AH NextSeq 500 | GR181114_CTACTAGC       | D14R4                |                    |  |
| GR181024    | 10/4/18             | 83117           | YES               | 144,000                          | 174,714               | 91,317                 | 15          | 0.394              | 141.84              | 2.22                  | CB7B6_WT            | male   | 9w    | 5                  | 50                | 50                 | 100                  | N/A                      | EC (50K); MG1100K; CD45H(100K);      | DO2       | 10408151     | N701         | 181213_N5500503_0808_AH NextSeq 500 | GR181024_TGCGCTTA       | D02R4                |                    |  |
| GR181212    | 10/4/18             | 72818           | YES               | 160,000                          | 122,906               | 88,790                 | 15          | 0.142              | 42.6                | 2.56                  | CB7B6_WT            | male   | 10w   | 4                  | 60                | 120                | 60                   | N/A                      | EC (60K); MG1120K; CD45H(60K);       | S02       | 10410132     | N701         | 190205_N5500503_0819_AH NextSeq 500 | GR181212_TGCGCTTA       | S02R3                |                    |  |
| GR180125    |                     | 83117           | no                | 176,000                          | 147,000               | 53,780                 | 16          |                    |                     |                       | CB7B6_WT            | male   | 8w    | 5                  | 43.2              | 47.3               | 109.5                | N/A                      | EC(43.2K); PMN(47.3K); Macro(109.5K) | D14       | 10391620     |              | 180213_N851191_0108_AH NextSeq 500  | GR180125                | D14R1                |                    |  |
| GR180517    |                     | 83117           | no                | 150,000                          | 96,000                | 83,196                 | 16          | 0.213              | 85.2                | 2.372                 | CB7B6_WT            | male   | 8w    | 1                  | N/A               | N/A                | N/A                  | N/A                      | Peripheral blood leukocytes (240K)   | N         |              |              |                                     |                         |                      |                    |  |
| GR18110701  | 10/4/18             | 83117           | YES               | 160,000                          | 147,993               | 94,385                 | 15          | 0.319              | 114.84              | 2.86                  | CB7B6_WT            | male   | 9w    | 2                  | N/A               | N/A                | N/A                  | N/A                      | Peripheral blood leukocytes (240K)   | S02       | 10407791     | N701         | 181211_N5500503_0806_AH NextSeq 500 | GR18110701_TGCGCTTA     | P8502R1              |                    |  |
| GR18110702  | 10/4/18             | 83117           | YES               | 160,000                          | 137,716               | 100,702                | 15          | 0.283              | 101.88              | 2.64                  | CB7B6_WT            | male   | 9w    | 2                  | N/A               | N/A                | N/A                  | N/A                      | Peripheral blood leukocytes (240K)   | DO2       | 10407791     | N702         | 181211_N5500503_0806_AH NextSeq 500 | GR18110702_CTACTAGC     | P8502R4              |                    |  |
| GR181120    | 10/4/18             | 72818           | YES               | 160,000                          | 121,272               | 136,795                | 15          | 0.143              | 68.64               | 3.46                  | CB7B6_WT            | male   | 9w    | 2                  | N/A               | N/A                | N/A                  | N/A                      | Peripheral blood leukocytes (240K)   | D14       | 10407791     | N704         | 181211_N5500503_0806_AH NextSeq 500 | GR181120_CTACTAGC       | P8514R1              |                    |  |
| GR18121901  | 10/4/18             | 72818           | YES               | 160,000                          | 139,771               | 95,287                 | 15          | 0.262              | 94.32               | 2.54                  | CB7B6_WT            | male   | 10w   | 2                  | N/A               | N/A                | N/A                  | N/A                      | Peripheral blood leukocytes (240K)   | S02       | 10410132     | N702         | 190205_N5500503_0819_AH NextSeq 500 | GR18121901_CTACTAGC     | P8502R2              |                    |  |
| GR18121902  | 10/4/18             | 72818           | YES               | 160,000                          | 129,494               | 85,421                 | 15          | 0.147              | 44.1                | 2.18                  | CB7B6_WT            | male   | 10w   | 2                  | N/A               | N/A                | N/A                  | N/A                      | Peripheral blood leukocytes (240K)   | DO2       | 10414864     | N701         | 190426_N5500503_0819_AH NextSeq 500 | GR18121902_TGCGCTTA     | P8502R3              |                    |  |
| GR190116    | 10/4/18             | 72818           | YES               | 160,000                          | 168,548               | 91,678                 | 15          | 0.285              | 98.325              | 2.44                  | CB7B6_WT            | male   | 10w   | 2                  | N/A               | N/A                | N/A                  | N/A                      | Peripheral blood leukocytes (240K)   | DO2       | 10414864     | N702         | 190426_N5500503_0819_AH NextSeq 500 | GR190116_CTACTAGC       | P8502R3              |                    |  |
| GR190410    | 10/04/18 0.9mm      | 012819C         | YES               | 154,666                          | 131,550               | 98,896                 | 15          | 0.19               | 91.2                | 2.76                  | CB7B6_WT            | male   | 9w    | 2                  | N/A               | N/A                | N/A                  | N/A                      | Peripheral blood leukocytes (240K)   | DO2       | 10416797     | N701         | 190611_N5500503_0919_AH NextSeq 500 | GR190410_TGCGCTTA       |                      |                    |  |
| GR190415    | 10/04/18 0.9mm      | 012819C         | YES               | 160,000                          | 152,104               | 118,868                | 15          | 0.148              | 82.88               | 2.22                  | CB7B6_WT            | male   | 9w    | 2                  | N/A               | N/A                | N/A                  | N/A                      | Peripheral blood leukocytes (240K)   | D14       | 10416797     | N702         | 190611_N5500503_0919_AH NextSeq 500 | GR190415_CTACTAGC       |                      |                    |  |
| GR190417    | 10/04/18 0.9mm      | 012819C         | YES               | 160,000                          | 1282 (103.3)          | 74,714                 | 15          | 0.309              | 30.9                | 2.68                  | CB7B6_WT            | male   | 9w    | 2                  | N/A               | N/A                | N/A                  | N/A                      | Peripheral blood leukocytes (240K)   | S02       | 10416797     | N704         | 190611_N5500503_0919_AH NextSeq 500 | GR190417_CTACTAGC       |                      |                    |  |
| GR190522    | 10/04/18 0.9mm      | 012819C         | YES               | 152,000                          | 127,439               | 91,437                 | 15          | 0.351              | 35.1                | 2.14                  | CB7B6_WT            | male   | 8w    | 2                  | N/A               | N/A                | N/A                  | N/A                      | Peripheral blood leukocytes (240K)   | S02       | 10417514     | N701         | 190624_N5500503_0929_AH NextSeq 500 | GR190522_TGCGCTTA       |                      |                    |  |
| GR190529    | 10/04/18 0.9mm      | 012819C         | YES               | 160,000                          | 131,550               | 90,234                 | 15          | 0.174              | 83.52               | 2.56                  | CB7B6_WT            | male   | 8w    | 2                  | N/A               | N/A                | N/A                  | N/A                      | Peripheral blood leukocytes (240K)   | D14       | 10417514     | N702         | 190624_N5500503_0929_AH NextSeq 500 | GR190529_CTACTAGC       |                      |                    |  |

**Table S3. Cell numbers among cell type classes of down-sampled young and aged brain datasets**

|           | <b>celltype</b> | <b>Aged</b> | <b>Young</b> |
|-----------|-----------------|-------------|--------------|
| <b>1</b>  | Mg              | 5970        | 5241         |
| <b>2</b>  | BAM             | 295         | 316          |
| <b>3</b>  | MdC             | 2112        | 2875         |
| <b>4</b>  | DC              | 470         | 921          |
| <b>5</b>  | Gran            | 301         | 324          |
| <b>6</b>  | Tc              | 836         | 380          |
| <b>7</b>  | NK              | 44          | 125          |
| <b>8</b>  | Bc              | 96          | 115          |
| <b>9</b>  | MaC             | 0           | 10           |
| <b>10</b> | EC              | 1747        | 1611         |
| <b>11</b> | MC              | 92          | 36           |
| <b>12</b> | Epi             | 20          | 27           |
| <b>13</b> | OD              | 16          | 18           |

**Table S4. Gene lists of module scores**

| <b>DAM</b> | <b>DIM</b> | <b>ISG</b> | <b>SAM</b> | <b>Foamy macrophages</b> | <b>monocytes</b> |
|------------|------------|------------|------------|--------------------------|------------------|
| Dkk2       | Atf3       | Rsad2      | Spp1       | Fabp4                    | S100a4           |
| Fabp5      | Btg2       | Socs1      | Fabp5      | Ctsl                     | Ms4a6c           |
| Gm1673     | Ccl4       | Ddx60      | Gpnmb      | Atp6v0d2                 | Crip1            |
| Gpnmb      | Ctss       | Ifit2      | Ctsb       | Gpnmb                    | Ctss             |
| Igf1       | Dusp1      | Ifit3      | Ctsl       | Fabp5                    | Ccl9             |
| Itgax      | Egr1       | Ifit3b     | Lgals3     | Htra1                    | F13a1            |
| Mamdc2     | Fos        | Herc6      | Lpl        | Epb41l3                  | Plac8            |
| Spp1       | Icam1      | Rtp4       | Fth1       | Pld3                     | Fn1              |
|            | Ier2       | Spats2l    | Cd63       |                          | Ccr2             |
|            | Ier5       | Ifi44l     | Ctsd       |                          | Psap             |
|            | Il1a       | Oas3       |            |                          | Ms4a4c           |
|            | Il1b       | Cxcl10     |            |                          | Npc2             |
|            | Itga6      | Mx1        |            |                          | Ifi30            |
|            | Jun        | Mx2        |            |                          | Lyz2             |
|            | Junb       | Isg15      |            |                          | Pld4             |
|            | Klf6       | Oasl1      |            |                          | Lamp1            |
|            | Tnf        | Ifi44      |            |                          | Ifitm3           |
|            | Zfp36      | Oas2       |            |                          | Smpdl3a          |
|            | Cd83       | Usp18      |            |                          | Ly86             |
|            | Fosb       | Epsti1     |            |                          | Ctsc             |
|            | Cd14       | Oas1e      |            |                          | Vim              |
|            | Fth1       | Oas1c      |            |                          | Lgals1           |
|            | Nfkbia     | Oas1b      |            |                          | Clec4a3          |
|            | Nfkbiz     | Oas1f      |            |                          | S100a10          |
|            |            | Oas1h      |            |                          | Prdx1            |
|            |            | Oas1g      |            |                          | Anxa5            |
|            |            | Oas1a      |            |                          | Ctsb             |
|            |            | Oas1d      |            |                          | Dbi              |
|            |            | Siglec1    |            |                          | Napsa            |

| <b>Module</b>     | <b>Reference</b>                                                                          |
|-------------------|-------------------------------------------------------------------------------------------|
| DAM               | Silvin et al. Immunity 2022 Aug 9;55(8):1448-1465.e6. doi: 10.1016/j.immuni.2022.07.004.  |
| DIM               | Silvin et al. Immunity 2022 Aug 9;55(8):1448-1465.e6. doi: 10.1016/j.immuni.2022.07.004.  |
| ISG               | Kim et al. Interferon Cytokine Res. 2018 Apr;38(4):171-185. doi: 10.1089/jir.2017.0127    |
| SAM               | Beuker et al. Nat. Commun. 2022 Feb 17;13(1):945. doi: 10.1038/s41467-022-28593-1.        |
| Foamy macrophages | Williams et al. Nat Immunol. 2020 Oct;21(10):1194-1204. doi: 10.1038/s41590-020-0768-4.   |
| monocytes         | Ballesteros et al. Cell 2020 Nov 25;183(5):1282-1297.e18. doi: 10.1016/j.cell.2020.10.003 |

**Table S5. Antibodies used for immunohistochemistry**

| <b>Antigen</b>                   | <b>Biological source</b> | <b>Clone</b> | <b>Isotype</b> | <b>Supplier</b> | <b>Cat. Num.</b> | <b>RRID</b>     | <b>Dilution</b> |
|----------------------------------|--------------------------|--------------|----------------|-----------------|------------------|-----------------|-----------------|
| <b>IGF1</b>                      | mouse                    | Sm1.2        | IgG1k          | Millipore       | 05-172           | AB_309<br>643   | 1:100           |
| <b>CD206</b>                     | rat                      | MR5D3        | IgG2a          | BioRad          | MCA2235          | AB_324<br>622   | 1:200           |
| <b>Iba1</b>                      | rabbit                   | polyclonal   |                | Wako            | 019-<br>19741    | AB_839<br>504   | 1:200           |
| <b>DsRed<br/>(TdTomato)</b>      | rabbit                   | polyclonal   |                | Takara          | 632496           | AB_100<br>13483 | 1:200           |
| <b>Anti-MHC<br/>II (I-a/I-E)</b> | rat                      | M5/114       | IgG2bk         | Millipore       | MABF33           | AB_108<br>07702 | 1:200           |

**Table S6. RNA scope probe list**

|    | <b>Reference</b> | <b>Name</b>                   |
|----|------------------|-------------------------------|
| 1  | 437511           | RNAscope Probe - Mm-Mrc1      |
| 2  | 480311-C2        | RNAscope Probe - Mm-Cd209a-C2 |
| 3  | 423381           | RNAscope Probe - Mm-Lrg1      |
| 4  | 426371-C2        | RNAscope Probe - Mm-Ms4a4c-C2 |
| 5  | 498711           | RNAscope Probe - Mm-Cst7      |
| 6  | 432871           | RNAscope Probe - Mm-Ccr7      |
| 7  | 403431-C3        | RNAscope Probe - Mm-Arg1-C3   |
| 8  | 408921-C2        | RNAscope Probe - Mm-Cxcl10-C2 |
| 9  | 546211-C2        | RNAscope Probe - Mm-Ccl8-C2   |
| 10 | 468421-C2        | RNAscope® Probe- Mm-Car4-C2   |
